# Supplementary material for: The influence of pore size and surface area of activated carbons on the performance of ionic liquid based supercapacitors
Source: Royal Society of Chemistry journal article supplement (doi:10.1039/c3cp52909f), 2013-01-01
Supplement: c3cp52909f.doc [file c3cp52909f.doc]

**Supplementary Information**

**The influence of pore size and surface area of activated carbons on the performance of ionic liquids based supercapacitors**

*Sebastian Pohlmann a, Belén Lobato b, Teresa A. Centeno*b, Andrea Balducci*a*

E-mail: andrea.balducci@uni-muenster.de

The structural characterizations were performed by N2 adsorption at 77 K (*Micromeritics ASAP 2010*). The standard software package provided the surface areas SNLDFT and SBET. The isotherm data was also analyzed by applying Kaneko’s comparison plot technique and Dubinin’s theory. The total surface area was also determined by immersion calorimetry into 0.4 M solutions of phenol in water, using the factor of -0.105 J m-2 1,2

The total oxygen content of the carbon surface [O] has been estimated from the enthalpy of immersion of carbon into benzene (-iH[C6H6]) and into water (-iH[H2O]).4

**Table S1.** Characteristics of the activated carbons obtained by different techniques.

| Carbon | [O]  (mmol g-1) | [O]  (µmol m-2) | Lo  (nm) | Smi  (m2 g-1) | Se  (m2g-1) | Specific surface area estimated by different methods | | | | | |
| --- | --- | --- | --- | --- | --- | --- | --- | --- | --- | --- | --- |
| SDR  (m2g-1) | Scomp  (m2g-1) | SDFT  (m2g-1) | Sphenol  (m2g-1) | SBET  (m2g-1) | TSA  (m2g-1) |
| CWH-30 | 0.58 | 0.80 | 1.04 | 731 | 23 | 754 | 722 | 720 | 701 | 940 | 724 |
| E Supra | 0.45 | 0.66 | 1.13 | 655 | 36 | 691 | 692 | 628 | 728 | 845 | 685 |
| Super 30 | 0.54 | 0.56 | 1.24 | 968 | 9 | 977 | 965 | 1021 | 921 | 1618 | 971 |
| SC-10 | 0.44 | 0.43 | 1.31 | 992 | 21 | 1013 | 990 | 1050 | 1025 | 1728 | 1020 |
| M30 | 1.29 | 1.11 | 1.45 | 1090 | 10 | 1100 | 1153 | 1257 | 1159 | 2398 | 1167 |

**References**

1 F. Stoeckli, in *Porosity in carbons. Characterization and applications*, (Ed: J. Patrick), Arnold, London, **1995**, pp. 67-92.

2 F. Stoeckli and T.A. Centeno, *J. Mater. Chem. A*, 2013, **1**, 6865-6873.

3 F. Stoeckli, A. Lavanchy, *Carbon*, 2000, **38**, 475-477.
